# Supplementary material
Source: MDPI journal article supplement (https://www.mdpi.com/2071-1050/15/16/12415)
Supplement: s1 [file s1]

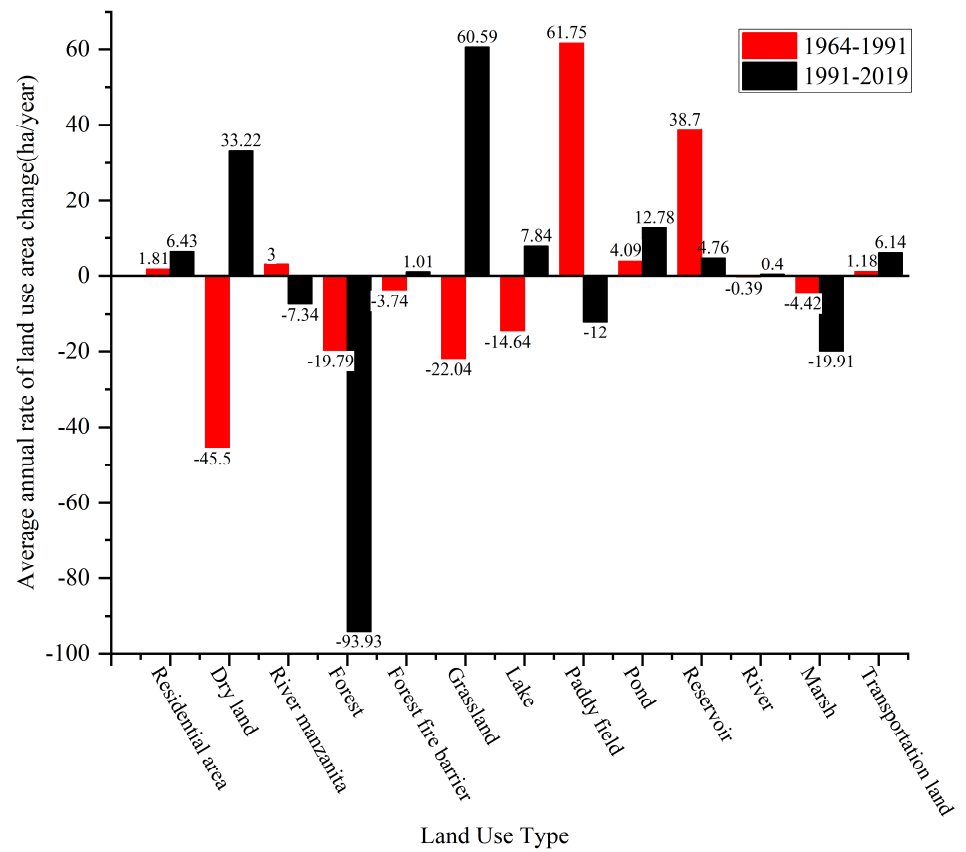

**Figure S1.** Average annual rate of change in the area of landscape types.

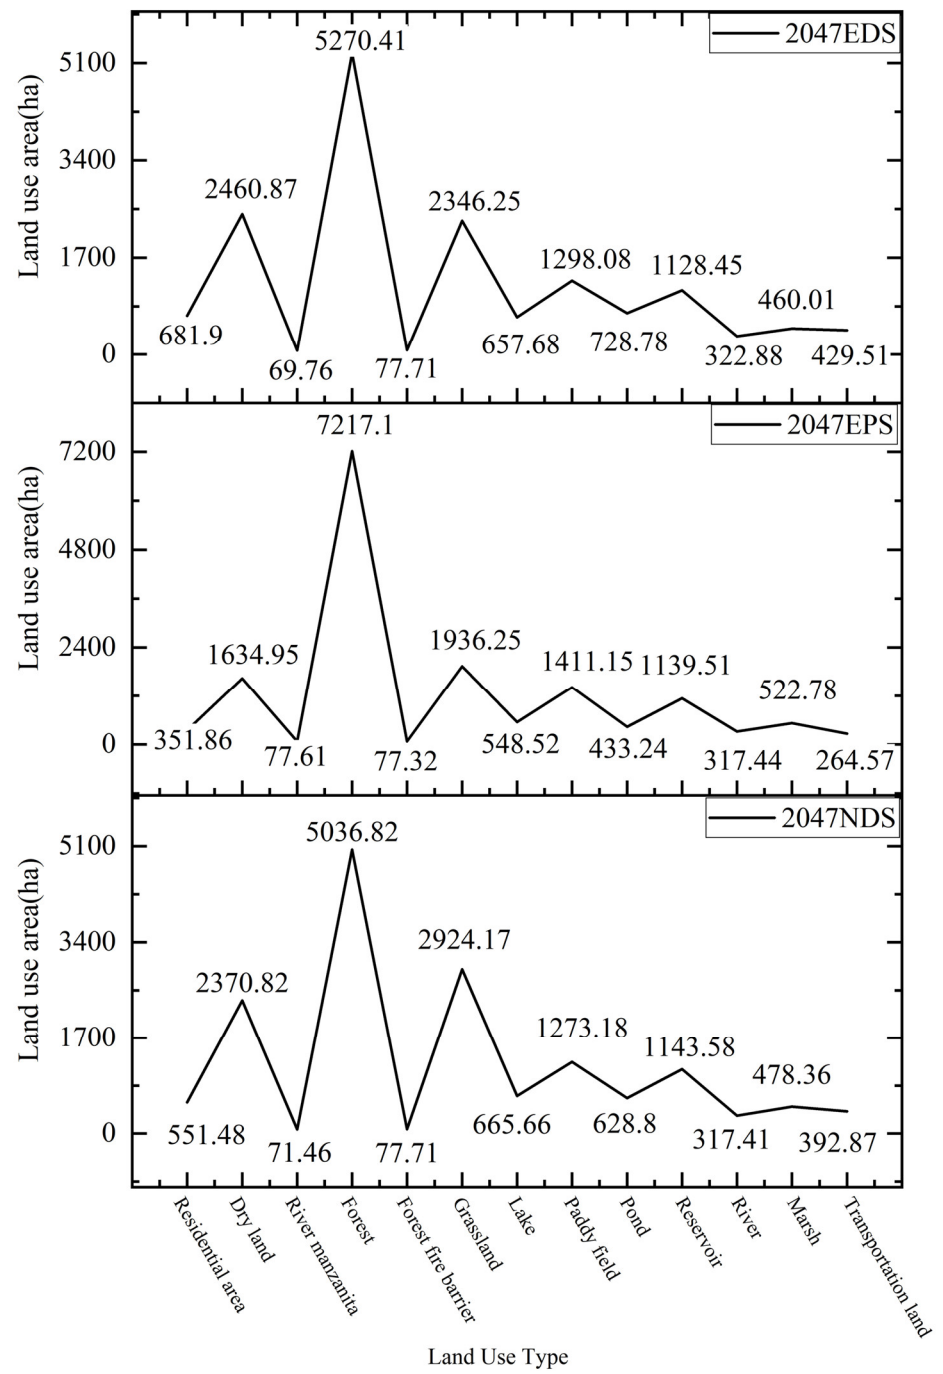

**Figure S2.** Comparison of land use under different scenarios.

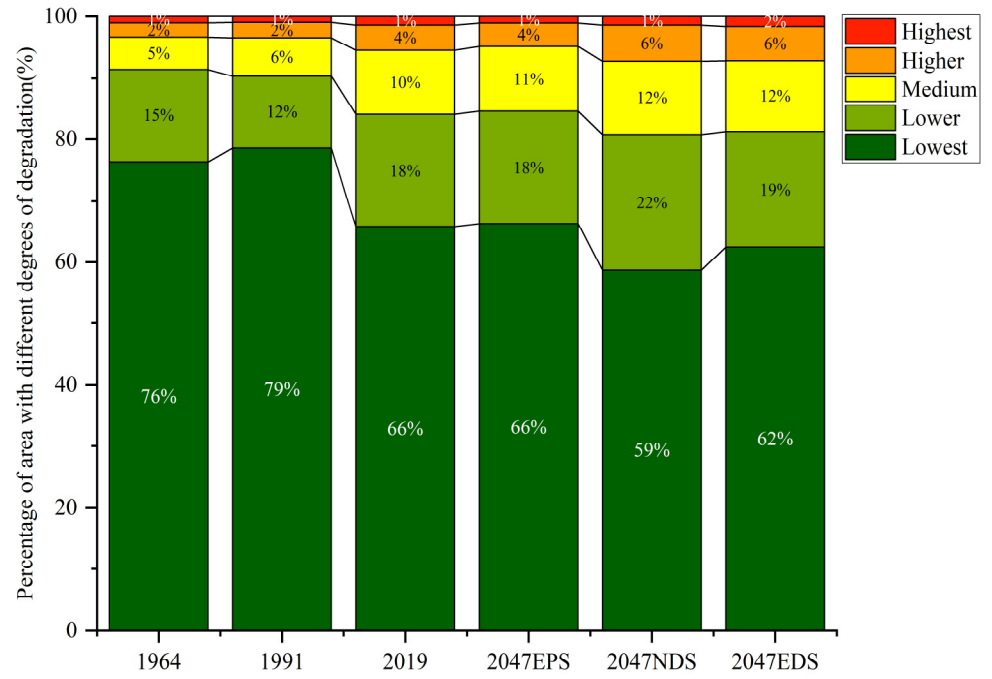

**Figure S3.** Area share of different habitat degradation degrees in different years.
